# Supplementary material for: A separator modified by barium titanate with macroscopic polarization electric field for high-performance lithium–sulfur batteries
Source: Royal Society of Chemistry journal article supplement (doi:10.1039/d3nr00263b), 2023-01-01
Supplement: d3nr00263b1.pdf [file d3nr00263b1.pdf]

## Separator modified by barium titanate with macroscopic polarization electric field for high-performance lithium-sulfur batteries

Li Ma,<sup>a,b</sup> You quan Zhang,<sup>a</sup> Chun xiao Zhang,<sup>a</sup> Hai Zhu,<sup>c</sup> Shuai Zhang,<sup>a</sup> Ming yang Yan,<sup>a</sup> Chao ping Liang,<sup>a</sup> Yan Zhang,<sup>a</sup> Li bao Chen,<sup>a</sup> Yue jiao Chen,<sup>a</sup> Wei feng Wei,<sup>a</sup> Liang jun Zhou,<sup>\*a</sup>

<sup>a</sup> State Key Laboratory of Powder Metallurgy, Central South University, Changsha, Hunan 410083, People's Republic of China

<sup>b</sup> Hunan Provincial Key Laboratory of Fine Ceramics and Powder Materials, School of Materials and Environmental Engineering, Hunan University of Humanities, Science and Technology, Loudi, 417000, China

<sup>c</sup> College of Chemistry and Chemical Engineering, Central South University, Changsha 410083, Hunan, China

\* Corresponding author E-mail addresses: alexander-zhou@csu.edu.cn

### Theoretical simulation

The structural optimizations and electronic structure calculations are performed based on density functional theory (DFT) as implemented in the Vienna Ab Initio Simulation Package (VASP) code based on the projector augmented wave (PAW) method with a cutoff energy of 600 eV<sup>1</sup>. The Brillouin zone sampling is carried out using the (3 × 3 × 1) Monkhorst-Pack grids for surface and Gamma for the structure. The convergence tolerance of energy is 1 × 10<sup>-5</sup> eV, maximum force is 0.002 eV Å<sup>-1</sup> and maximum displacement is 0.002 Å<sup>2</sup>. The binding energy of defects was defined as :  $E_{\text{bind}}^{\text{Total}} = E_{\text{Total}}^{\text{(BaTiO}_3\text{)}} - E_{\text{Total}}^{\text{(Li}_2\text{S}_x)}$ , where  $E_{\text{Total}}$  is the energy of the relevant supercell of  $\text{Li}_2\text{S}_x$  adsorbed with  $\text{BaTiO}_3$ .  $E_{\text{Total}}^{\text{(BaTiO}_3\text{)}}$  is the energy of the relevant supercell of  $\text{BaTiO}_3$ ,  $E_{\text{Total}}^{\text{(Li}_2\text{S}_x\text{)}}$  is the energy of  $\text{Li}_2\text{S}_x$ . The preferential exposure surface of is (001) owing to the smallest surface energy in Table S2.

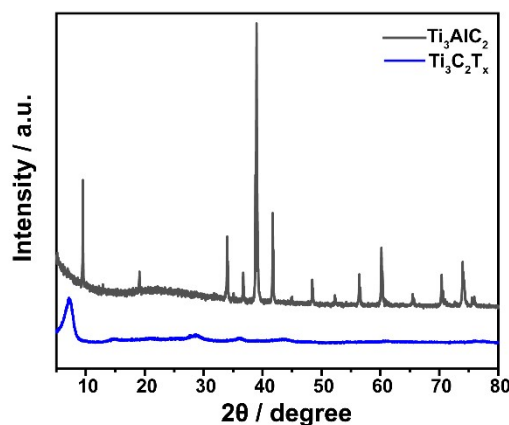

Fig. S1. XRD spectra of the  $\text{Ti}_3\text{C}_2\text{T}_x$  and  $\text{Ti}_3\text{AlC}_2$ .

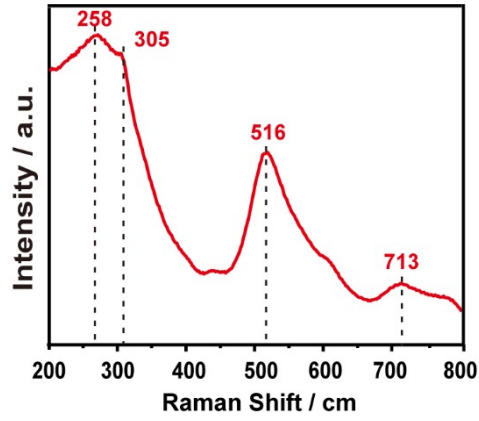

Fig. S2. Raman spectra of the BTO. The band at 305 cm<sup>-1</sup> was on behalf of the asymmetry of the TiO<sub>6</sub> octahedron.

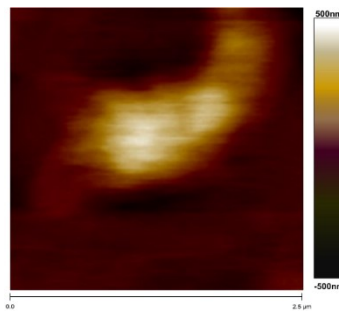

Fig. S3. The BTO topography image obtained by PFM characterization

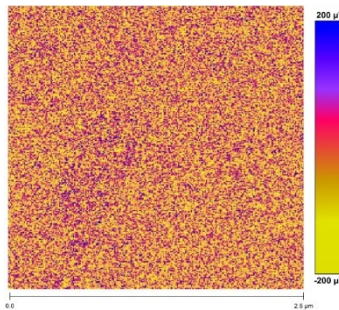

Fig. S4. The BTO amplitude image obtained by PFM characterization

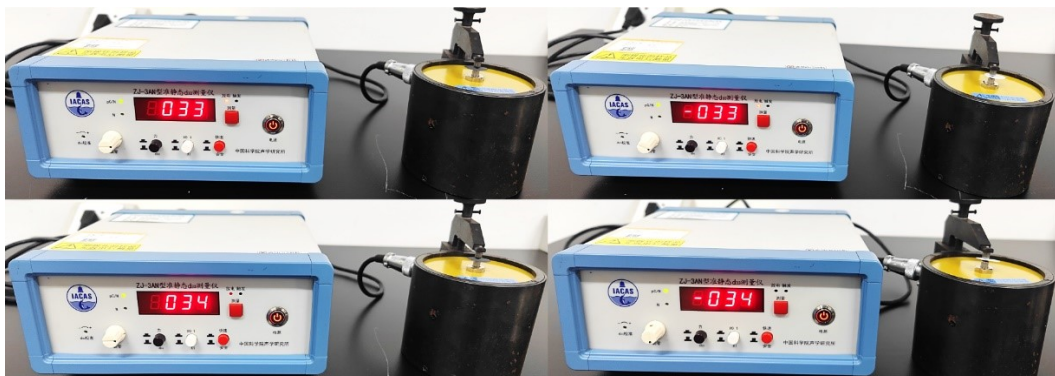

Fig. S5.  $d_{33}$  values of the PP/PBTO surface. The front side of PP/PBTO is positively charged, while the reverse side is negatively charged, meaning the electropositivity of PP/PBTO surface.

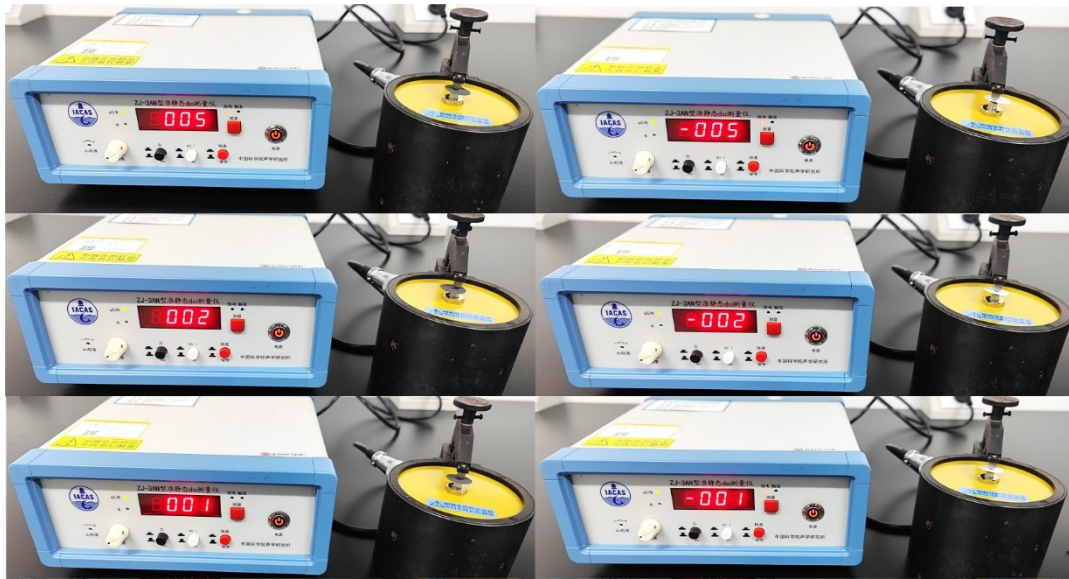

**Fig. S6.**  $d_{33}$  values of PP/BTO surface

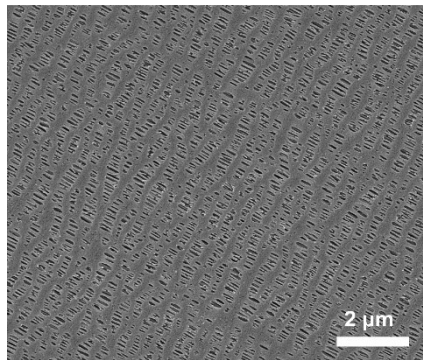

**Fig.S7** SEM image of pristine PP

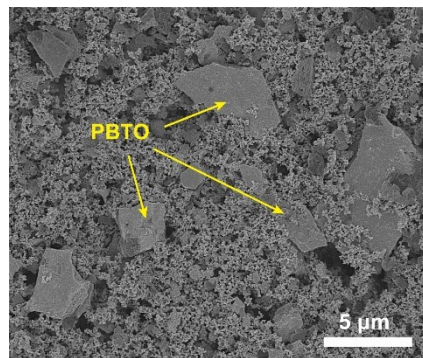

**Fig.S8** SEM image of pristine PP/PBTO

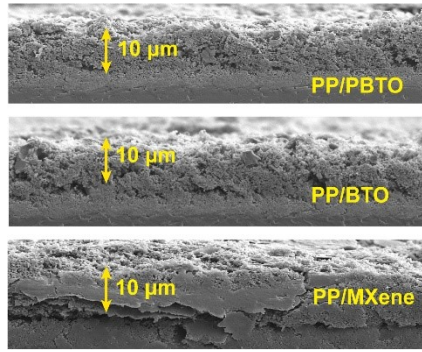

**Fig.S9** SEM images for cross sections of PP/PBTO, PP/BTO and PP/MXene

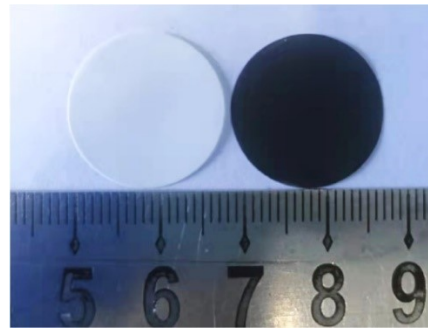

**Fig. S10.** Photographs of the pristine PP separator and PP/PBTO.

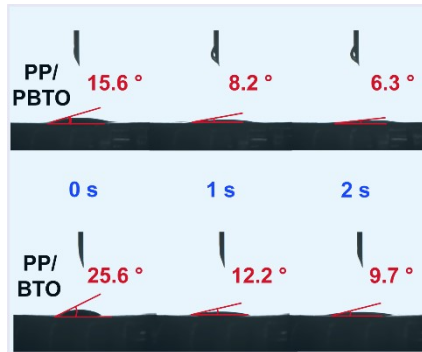

**Fig.S11** Contacting angle testing results

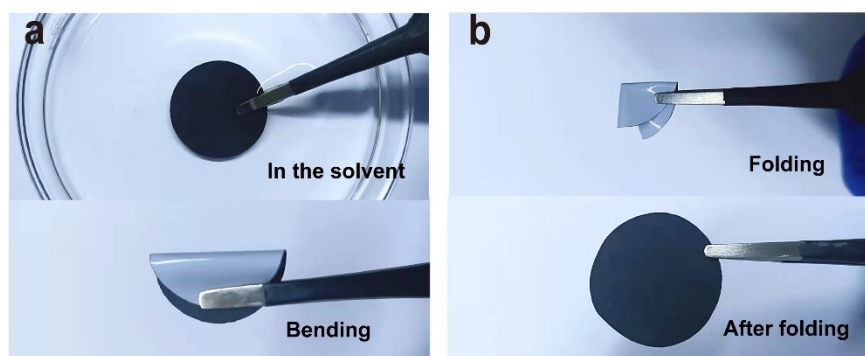

Fig.S12 a) and b) Photographs of PP/PBTO under different stresses.

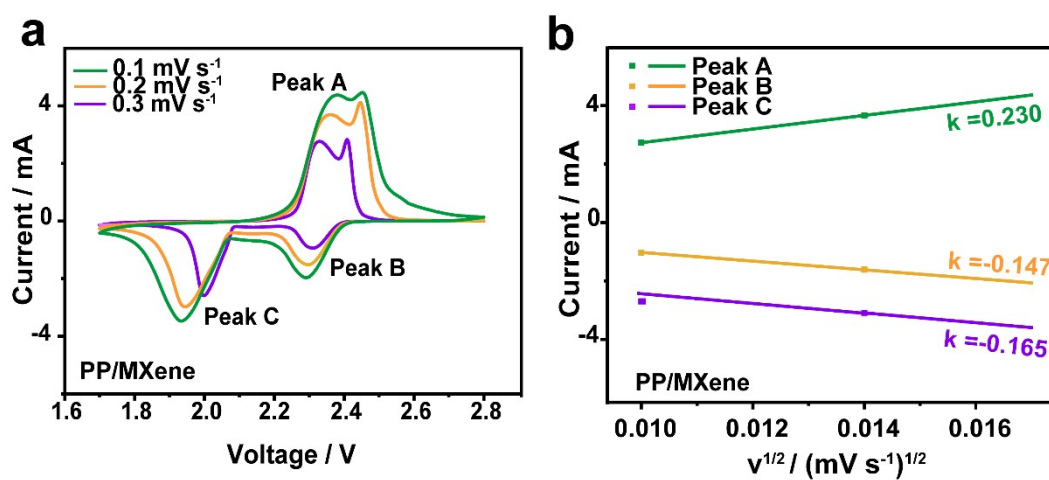

Fig. S13. a) CV curves at scan rates ranging from 0.1 to 0.3 mV/s for the PP/MXene. b)

The slope of the equation is positively related with Li<sup>+</sup> diffusion.

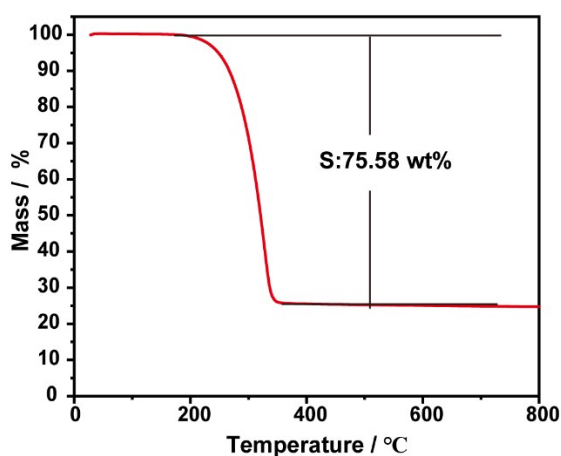

Fig. S14. TGA curve of the S/CNT electrode.

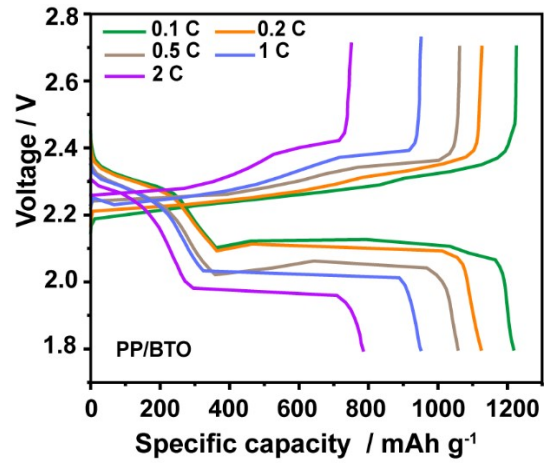

Fig. S15. Discharge-charge curves of the BTO battery at different rates.

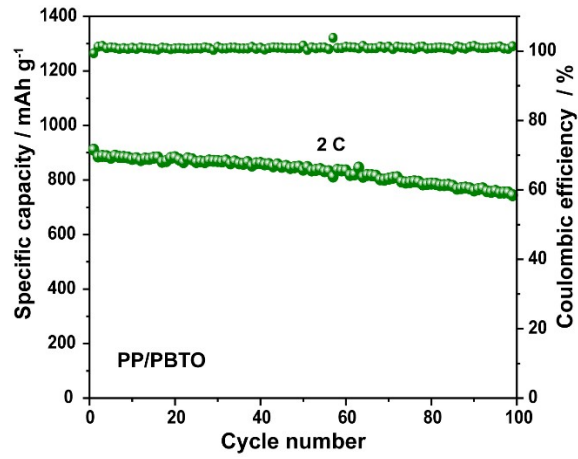

Fig. S16. The PBTO battery at current density of 2 C.

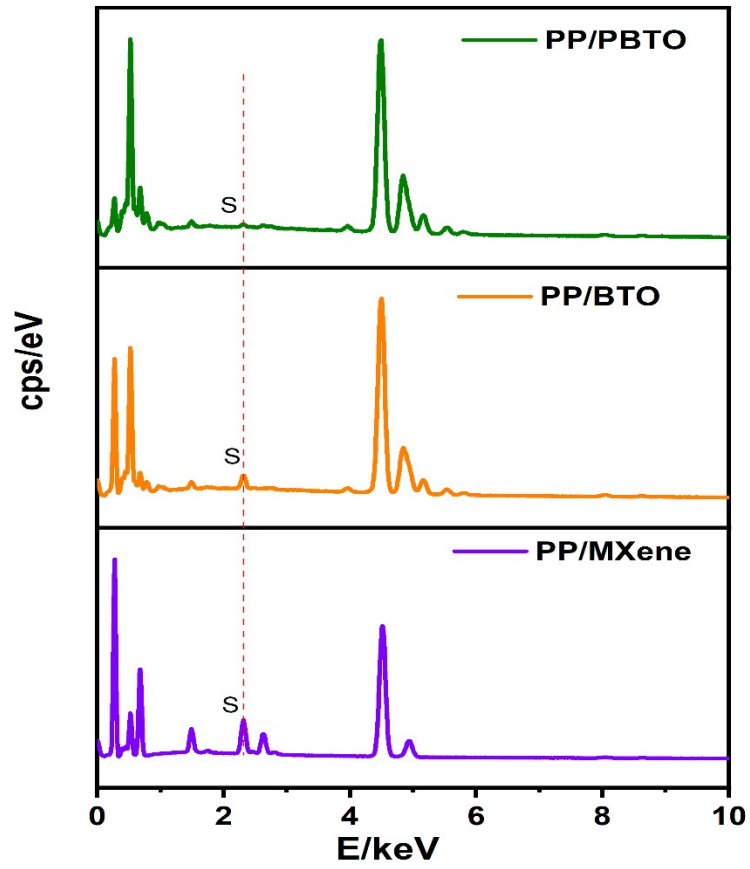

Fig. S17.EDS images of functionalized separators after 100 cycles at 1C.

**Table S1. The binding energy of all the structure.**

|               | BaTiO <sub>3</sub> +Li <sub>2</sub> S <sub>4</sub> | BaTiO <sub>3</sub> +Li <sub>2</sub> S <sub>6</sub> | BaTiO <sub>3</sub> +Li <sub>2</sub> S <sub>8</sub> |
|---------------|----------------------------------------------------|----------------------------------------------------|----------------------------------------------------|
| Before Poling | -2.00 eV                                           | -1.26 eV                                           | -0.77 eV                                           |
| After Poling  | -2.07 eV                                           | -1.50 eV                                           | -0.10 eV                                           |

**Table S2. The Surface energy of (001), (010) and (100) surface for BaTiO<sub>3</sub>.**

| Surface    | 001       | 010       | 100       |
|------------|-----------|-----------|-----------|
| E(Surf)/eV | -495.2 eV | -471.6 eV | -486.6 eV |

**Table S3. Diffusion coefficient of Li<sup>+</sup> for the PP/PBTO, PP/BTO and PP/MXene.**

| D <sub>Li<sup>+</sup></sub> × 10 <sup>-8</sup> (cm <sup>2</sup> /s) | Peak A       | Peak B       | Peak C      |
|---------------------------------------------------------------------|--------------|--------------|-------------|
| PP/MXene                                                            | 7.17         | 3.73         | 2.92        |
| PP/BTO                                                              | 12.48        | 7.12         | 3.46        |
| PP/PBTO                                                             | <b>14.29</b> | <b>10.07</b> | <b>3.99</b> |

## References

1. G. Kresse and J. Hafner, *Phys Rev B Condens Matter*, 1993, **47**, 558-561.
2. A. E. Mattsson, R. Armiento and T. R. Mattsson, *Phys Rev Lett*, 2008, **101**, 239701; author reply 239702.
